# Supplementary material for: SATB1 Expression Is Associated with Biologic Behavior in Colorectal Carcinoma In Vitro and In Vivo
Source: PubMed Central journal article supplement (PMC3543436; doi:10.1371/journal.pone.0047902), 2013-01-11
Supplement: pone.0047902.s001.pdf [file pone.0047902.s001.pdf]

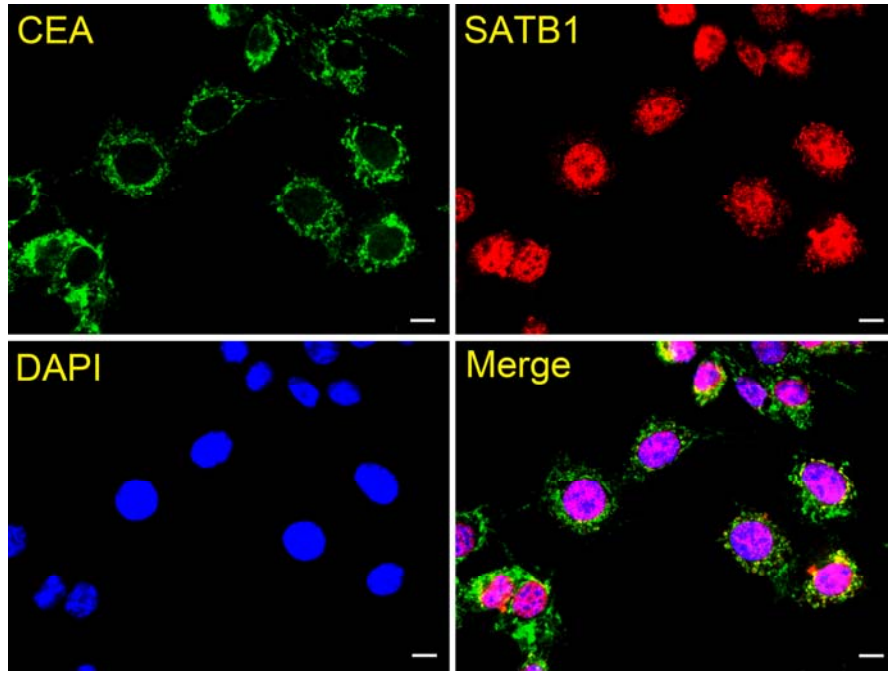

**Figure S1** Colocalization of SATB1 and CEA in CRC cells with confocal microscopy. Bars, 50µm.
