# Supplementary material for: SATB1 Expression Is Associated with Biologic Behavior in Colorectal Carcinoma In Vitro and In Vivo
Source: PubMed Central journal article supplement (PMC3543436; doi:10.1371/journal.pone.0047902), 2013-01-11
Supplement: pone.0047902.s002.pdf [file pone.0047902.s002.pdf]

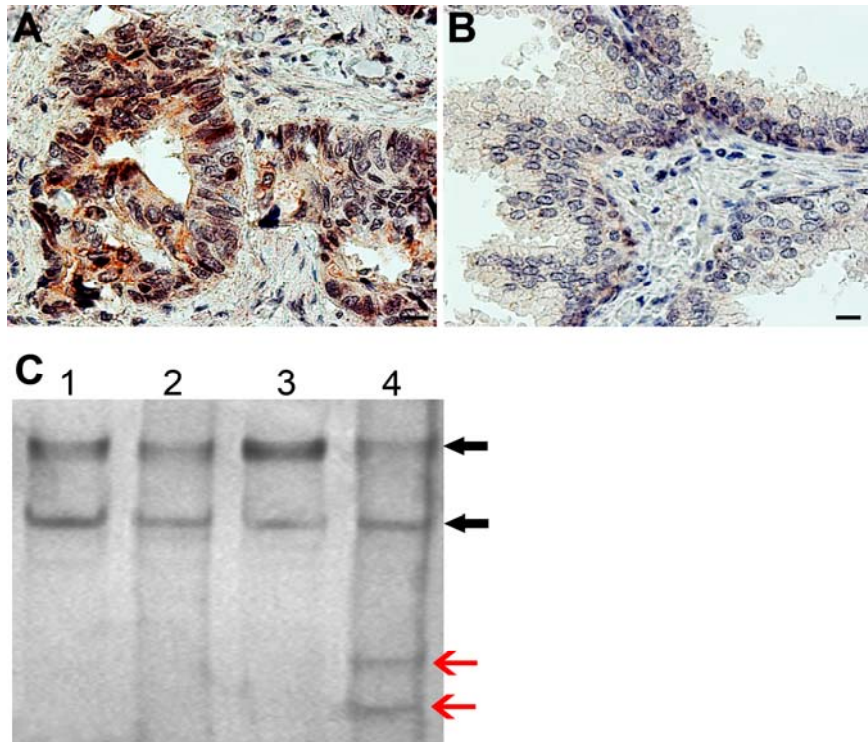

**Figure S2** Detection of APC loss and BRAF<sup>V600E</sup> in CRC.

**A, B:** Via IHC and visualized with AEC, APC protein was detected in well-differentiated adenocarcinoma (**A**) and not in mucinous adenocarcinoma (**B**). Bars, 50 $\mu$ m.

**C:** SSCP analysis of BRAF<sup>V600E</sup> of 4 CRC cases. Normal bands are indicated with black arrow heads and those of V600E mutation are demonstrated with red arrow heads.
